# Supplementary material
Source: publisher figshare collection journal article supplement (https://tandf.figshare.com/articles/dataset/_/14054266)
Supplement: Supplementary file 1 [file 1]

Supplementary material for Mendez et al., “Oculocutaneous albinism type 1B associated with a functionally significant tyrosinase gene polymorphism detected with Whole Exome Sequencing”, *Ophthalmic Genetics*, 2021.

---

**Table S1.** OCA gene panel

AP3B1, AP3D1, BLOC1S3, BLOC1S6, C10ORF11, DTNBP1, FRMD7, GPR143,  
HPS1, HPS3, HPS4, HPS5, HPS6, LYST, MC1R, MLPH, MYO5A, OCA2, OCA5,  
RAB27A, SLC24A5, SLC45A2, TYR, TYRP1
