# Supplementary material
Source: publisher figshare collection journal article supplement (https://tandf.figshare.com/articles/dataset/_/14054266)
Supplement: Supplementary file 2 [file 1]

CLUSTAL O(1.2.4) multiple sequence alignment

```

SP|P14679|TYRO_HUMAN  MLLAVLYCLLWSFQTSAGHFPRACVSSKNLMEKECCPPWSGDRSPCGQLSGRGSCQNILL 60
SP|Q9BDE0|TYRO_GORGO  MLLAVLYCLLWSFQTSAGHFPRACVSSKNLMEKECCPPWSGDRSPCGQLSGRGSCQNILL 60
SP|P54834|TYRO_CANLF  MLLAALCCLLWSFRTSAGHFPRACASSKSLMEKECCPPWSGDGSPCGQLSGRGACQDII 60
SP|Q8MIU0|TYRO_BOVIN  MLLAALYCLLWSFRTSAGHFPRACASSKSLTEKECCPPWAGDGSPCGRLSGRGSCQDVI 60
SP|P11344|TYRO_MOUSE  MFLAVLYCLLWSFQISDGHFPRACASSKNLLAKECCPPWMDGSPCGQLSGRGSCQDILL 60
SP|P55024|TYRO_CHICK  MFLFAMGLLLVILQPSTGQFPRVCANTQSLLRKECCPPWDGDTPCGERSNRGTQCRILL 60
      *: *  .:  **  .:  *  *:***.*.:.:.*  *****  **  :***.  *.**:*  :*:

SP|P14679|TYRO_HUMAN  SNAPLGPQFPFTGVDDRESWPSVFYNRTCQCSGNFMGFNCGNCKFGFWGPNCTERRLLVR 120
SP|Q9BDE0|TYRO_GORGO  SNAPLGPQFPFTGVDDRESWPSVFYNRTCQCSGNFMGFNCGNCKFGFWGPNCTERRLLVR 120
SP|P54834|TYRO_CANLF  SNAPFGPQFPFTGVDDRESWPSVFYNRTCQCFGNFMGFNCGNCKFGFWGQNCTEKRLLR 120
SP|Q8MIU0|TYRO_BOVIN  STAPLGPQFPFTGVDDRESWPSIFYNRTCQCFSNFMGFNCGSCKFGFRGPRCTERRLLVR 120
SP|P11344|TYRO_MOUSE  SSAPSGPQFPFGVDDRESWPSVFYNRTCQCSGNFMGFNCGNCKFGFGGPNCTEKRLIR 120
SP|P55024|TYRO_CHICK  SQAPLGPQFPFSGVDREDWPSVFYNRTCRCRGNFMGFNCGECKFGFSGQNCTERRLRTR 120
      *  *  *****.******.***:******:*  .*****.******  *  .***:*  :  *

SP|P14679|TYRO_HUMAN  RNIFDLSAPEKDKFFAYLTLAKHTISSDYVIPIGTYGQMKNGSTPMFNDINIYDLFVWMH 180
SP|Q9BDE0|TYRO_GORGO  RNIFDLSAPEKDKFFAYLTLAKHTISSDYVIPIGTYGQMKNGSTPMFNDINIYDLFVWMH 180
SP|P54834|TYRO_CANLF  KNIFDLSVPEKNKFLAYLTLAKHTTSPDYVIPTGTYGQMNGSTPMFNDINIYDLFVWMH 180
SP|Q8MIU0|TYRO_BOVIN  RNIFDLSVPEKNKFLAYLTLAKHTTSPDYVIPTGTYGQMNHGTTPLFNDVSVYDLFVWMH 180
SP|P11344|TYRO_MOUSE  RNIFDLSVSEKNKFFSYLTLAKHTISSVYVIPTGTYGQMNGSTPMFNDINIYDLFVWMH 180
SP|P55024|TYRO_CHICK  RNIFQLTISEKDKFLAYLNLAKNIPSKDYVIATGTYAQMNGSNPMFRNINVYDLFVWMH 180
      :***.*:  **:**:**.***:*  *  ***  **.***:**:**.*:.*.:.:*****

SP|P14679|TYRO_HUMAN  YYVSM DALLGGSEIWRDIDFAHEAPAFLPWHRLFLLRWEQEIQKLTGDNFTIPYDWRD 240
SP|Q9BDE0|TYRO_GORGO  YYVSM DALLGGSEIWRDIDFAHEAPAFLPWHRLFLLRWEQEIQKLTGDNFTIPYDWRD 240
SP|P54834|TYRO_CANLF  YYVSRDTLLGGSEIWKDIDFAHEAPGFLPWHRLFLLRWEQEIQKLTGDNFTIPYDWRD 240
SP|Q8MIU0|TYRO_BOVIN  YYVSRDTLLGDSEVWRDIDFAHEAPGFLPWHRLFLLRWEQEIQKLTGDNFTIPYDWRD 240
SP|P11344|TYRO_MOUSE  YYVSRDTLLGGSEIWRDIDFAHEAPGFLPWHRLFLLRWEQEIRELTGDNFTIPYDWRD 240
SP|P55024|TYRO_CHICK  YYASRDTLLGGSNVWRDIDFAHEAPGFLPWHRAFLLWREIQKITGDNFTIPYDWRD 240
      **.*  *:***.*:.*:*****.******  **  **:**:**:**:*****:*****

SP|P14679|TYRO_HUMAN  AEKCDICTDEYMGQHPTNPNNLSPASFFSSWQIVCSRLEEYNSHQSLCNGTPEGPLRN 300
SP|Q9BDE0|TYRO_GORGO  AEKCDICTDEYMGQHPTNPNNLSPASFFSSWQIVCSRLEEYNSHQSLCNGTPEGPLRN 300
SP|P54834|TYRO_CANLF  AKSCDICTDEYMGGRNPANPNLSPASFFSSWQIVCTRLEEYNSRQALCDGTPEGPLRN 300
SP|Q8MIU0|TYRO_BOVIN  AENC DVCTDEYMGGRNPANPNLSPASFFSSWQIVCSRLEEYNSRQALCNGTSEGPLRN 300
SP|P11344|TYRO_MOUSE  AENC DICTDEYLGHRHPENPNLSPASFFSSWQIICRSEEEYNSHQVLCNGTPEGPLRN 300
SP|P55024|TYRO_CHICK  AEDCVICTDEYMGQHPTNPNNLSPASFFSSWQIVCTQSEEYNSQQALCNATSEGPIRN 300
      *:.*  :*****.**:.*  *****.**:.*:.*  :*****.*  **.*  ***:  **

SP|P14679|TYRO_HUMAN  PGNHDKSRTPLRPSSADVEFCLSLTQYESGSM DKAANFSFRNTLEGFASPLTGIADASQS 360
SP|Q9BDE0|TYRO_GORGO  PGNHDKSRTPLRPSSADVEFCLSLTQYESGSM DKAANFSFRNTLEGFASPLTGIADASQS 360
SP|P54834|TYRO_CANLF  PGNHDKARTPLRPSSADVEFCLSLTQYESDSMDKAANFSFRNTLEGFASPLTGIADASQS 360
SP|Q8MIU0|TYRO_BOVIN  PGNHDKARTPLRPSSADVEFCLSLTQYESGSM DKAANFSFRNTLEGFADPVTGIADASQS 360
SP|P11344|TYRO_MOUSE  PGNHDKAKTPLRPSSADVEFCLSLTQYESGSM DRTANFSFRNTLEGFASPLTGIADPSQS 360
SP|P55024|TYRO_CHICK  PGNNDKSRTPLRPSSSEVEFCLTLTQYESGSM DKMANYSFRNTLEGFADPHTAISNISQS 360
      ***.**:.******:*****.******.***:*  **.******.*  *.*:  ***

SP|P14679|TYRO_HUMAN  SMHNALHIYMNGTMSQVQGSANDPIFLLHHA FVDSIFEQWLRHRHPLQEVYPEANAPIGH 420
SP|Q9BDE0|TYRO_GORGO  SMHNALHIYMNGTMSQVQGSANDPIFLLHHA FVDSIFEQWLRHRHPLQEVYPEANAPIGH 420
SP|P54834|TYRO_CANLF  SMHNALHIYMNGTMSQVPGSANDPIFLLHHA FVDSIFEQWLRHRHPLQEVYPEANAPIGH 420
SP|Q8MIU0|TYRO_BOVIN  SMHNALHIYMNGTMSQVPGSANDPIFLLHHA FVDSIFEQWLRKYHPLQDVYPEANAPIGH 420
SP|P11344|TYRO_MOUSE  SMHNALHIFMNGTMSQVQGSANDPIFLLHHA FVDSIFEQWLRHRHPLLEVYPEANAPIGH 420
SP|P55024|TYRO_CHICK  GLHNALHIYMNGSMSQVQGSANDPIFILHHA FVDSIFERWLRHRHPLLEVYPAANAPIGH 420
      .:*****.***:***  *****.******.***:**:.*  :***  *****

SP|P14679|TYRO_HUMAN  NRESYMPFPIPLYRNGDFFISSKDLGYDYSYLQSDPD SFQDYIKSYLQASRIWSWLLG 480
SP|Q9BDE0|TYRO_GORGO  NRESYMPFPIPLYRNGDFFISSKDLGYDYSYLQSDPD SFQDYIKSYLQASRIWSWLLG 480
SP|P54834|TYRO_CANLF  NRESYMPFPIPLYRNGDLFISSRDLGYDYSNLQESERDIFQDYIKPYLQASRIWPWLIG 480
SP|Q8MIU0|TYRO_BOVIN  NRESYMPFPIPLYRNGDFFISSKDXGYDYSYLQDSEPDIFQDYIKPYLQASRIWPWLIG 480
SP|P11344|TYRO_MOUSE  NRDSYMPFPIPLYRNGDFFITSKDLGYDYSYLQESDPGFYRNYIEPYLQASRIWPWLLG 480
SP|P55024|TYRO_CHICK  NRENYMPFPIPLYRNGEFFISSRELGYDYEYLQEPALGSFQDFLIPYLKQAHQIWPWLVG 480
      *:.*  *****.*:***:*:  ****.  **:  .  :*:  **:*  :**  ***:

SP|P14679|TYRO_HUMAN  AAMVGAVLTALLAGLVSLLRHK---RKQLPEEKQPLLMEKEDYHSL-YQSHL 529
SP|Q9BDE0|TYRO_GORGO  AAMVGAVLTALLAGLVSLLRHK---RKQLPEEKQPLLMEKEDYHSL-YQSHL 529
SP|P54834|TYRO_CANLF  AAVVGCVVTA VLGGLTSLLCRRN---RKQLHEEKQPLLMEKEDYHSLLYQTHL 530
SP|Q8MIU0|TYRO_BOVIN  AAVVGSVLTAVLGGLTSLLCRRK---RNQLPEEKQPLLMEKEDYHNLMYQSHL 530
SP|P11344|TYRO_MOUSE  AALVGAVIAAALSGLSSRLCLQKKKKKKQPQEERQPLLMDKDDYHSLLYQSHL 533
SP|P55024|TYRO_CHICK  AAVIGGIITAVLSGLIL-ACRK---KRKGTSP EIQPLLTESEDYNNVSYQSHF 529
      ***:*  :*:  *.**  *  :  :  *  ****  :*:*:  ***:

```
